# Supplementary material
Source: PubMed Central journal article supplement (PMC3491513)
Supplement: 1208160109_pnas.201208160SI.pdf [file 1208160109_pnas.201208160SI.pdf]

# Supporting Information

Ghiglione et al. 10.1073/pnas.1208160109

## SI Materials and Methods

**Data Analysis Pipeline.** The hypervariable V6 region of the SSU rRNA gene in bacteria was amplified using a combination of 967F (forward) and 1046R (reverse) primers under conditions described previously (1). Amplicons were sequenced using pyrosequencing technology (454 Life Sciences; GS20) at the Marine Biological Laboratory. Random sequencing errors were removed as described previously (2). To normalize the number of tags sequenced between samples and datasets and locations, tags were randomly resampled to the sample with the fewest tags using DaisyChopper version 0.6 (3). Analyses of tag sequences were based on the frequency of resampled tags analyzed in Mothur (4) following a work flow that included multiple alignment to Silva database reference alignment (June 29, 2010), error-minimization using a “preclustering” step, and then a distance matrix was generated as input for “cluster,” from which output files were created. Clusters based on a distance of 0.03 ( $\geq 97\%$  identity) were used in all downstream analyses (these have up to 2 mismatches per 60-bp sequence). In addition, Mothur was used to define OTUs at similarity thresholds ranging from 87 to 100%. The number of remaining OTUs diminished with the decreasing SSU rRNA sequence similarity threshold used to define OTUs, and the percentage of remaining OTUs between one threshold and the next was plotted for each similarity value. Differences in the proportion of remaining OTUs between samples were used as a metric for comparison of the phylogenetic structure between communities (5). Taxonomic identification of the sequence reads (tags) followed the approach by Sogin et al. (6) and Huse et al. (7). Representative sequences for clustered tags originating from a global reference dataset at the 0.03 distance level are available at <http://vampls.mbl.edu>.

**Similarity-Based Cluster and Statistical Analyses.** Similarity-based cluster and statistical analyses were performed using the unweighted pair group method with arithmetic mean (UPGMA) (Primer version 6 software). A similarity profile test (SIMPROF)

(Primer version 6) was performed on a null hypothesis that a specific subcluster can be recreated by permuting the entry species and samples. The significant branch (SIMPROF,  $P < 0.05$ ) was used as a prerequisite for defining bacterial clusters. One-way analysis of similarity (ANOSIM) (Primer version 6) was performed on the same distance matrix to test the null hypothesis that there was no difference between bacterial communities of different clusters. Similarity percentage (SIMPER) (8) was used to determine which individual OTUs contributed most to the dissimilarity between groups of samples.

The resulting Bray–Curtis distance matrix was used to build a UPGMA tree of sample relationships. This resulting tree was imported in the web version of UniFrac (9), together with respective groups according to depth, distance from shore, and regions. UniFrac and  $P$  test significance were performed on all samples together and pairs of samples.

Relationships between bacterioplankton communities and environmental parameters were assessed using a direct gradient approach, canonical correspondence analysis (CCA) (CANOCO version 4.5) according to ref. 10. Spearman rank pairwise correlations between the environmental variables (depth, temperature, salinity, chlorophyll, latitude, and longitude; Table S1) helped to determine their significance. To statistically evaluate the significance of the first canonical axis and of all canonical axes together, we used Monte Carlo permutation full model test with 199 unrestricted permutations. Significant variables were chosen using a forward-selection procedure and 999 permutations. Furthermore, we specifically examined the relationship between latitude and OTU richness based on the Chao1 richness estimator calculated using the application in the Mothur package of executable programs. The analysis was limited to surface water samples at depths of 0–40 m (only two samples were collected at depths below 11 m) and deep samples collected at depths below 200 m. The Spearman Rank correlation (and significance) was calculated for latitude vs. Chao1 datasets in the “surface” and “deep.”

1. Huber JA, et al. (2007) Microbial population structures in the deep marine biosphere. *Science* 318:97–100.
2. Huse SM, Huber JA, Morrison HG, Sogin ML, Welch DM (2007) Accuracy and quality of massively parallel DNA pyrosequencing. *Genome Biol* 8:R143.
3. Gilbert JA, et al. (2009) The seasonal structure of microbial communities in the Western English Channel. *Environ Microbiol* 11:3132–3139.
4. Schloss PD, et al. (2009) Introducing mothur: Open-source, platform-independent, community-supported software for describing and comparing microbial communities. *Appl Environ Microbiol* 75:7537–7541.
5. Barberán A, Fernández-Guerra A, Auguet JC, Galand PE, Casamayor EO (2011) Phylogenetic ecology of widespread uncultured clades of the Kingdom Euryarchaeota. *Mol Ecol* 20:1988–1996.
6. Sogin ML, et al. (2006) Microbial diversity in the deep sea and the underexplored “rare biosphere”. *Proc Natl Acad Sci USA* 103:12115–12120.
7. Huse SM, Welch DM, Morrison HG, Sogin ML (2010) Ironing out the wrinkles in the rare biosphere through improved OTU clustering. *Environ Microbiol* 12:1889–1898.
8. Clarke KR, Warwick RW (2001) *Change in Marine Communities: An Approach to Statistical Analysis and Interpretation* (PRIMER-E, Plymouth, UK), 2nd Ed, pp 1–72.
9. Lozupone C, Hamady M, Knight R (2006) UniFrac—an online tool for comparing microbial community diversity in a phylogenetic context. *BMC Bioinformatics* 7:371.
10. Ghiglione JF, Larcher M, Lebaron P (2005) Spatial and temporal scales of variation in bacterioplankton community structure in the NW Mediterranean Sea. *Aquat Microb Ecol* 40:229–240.



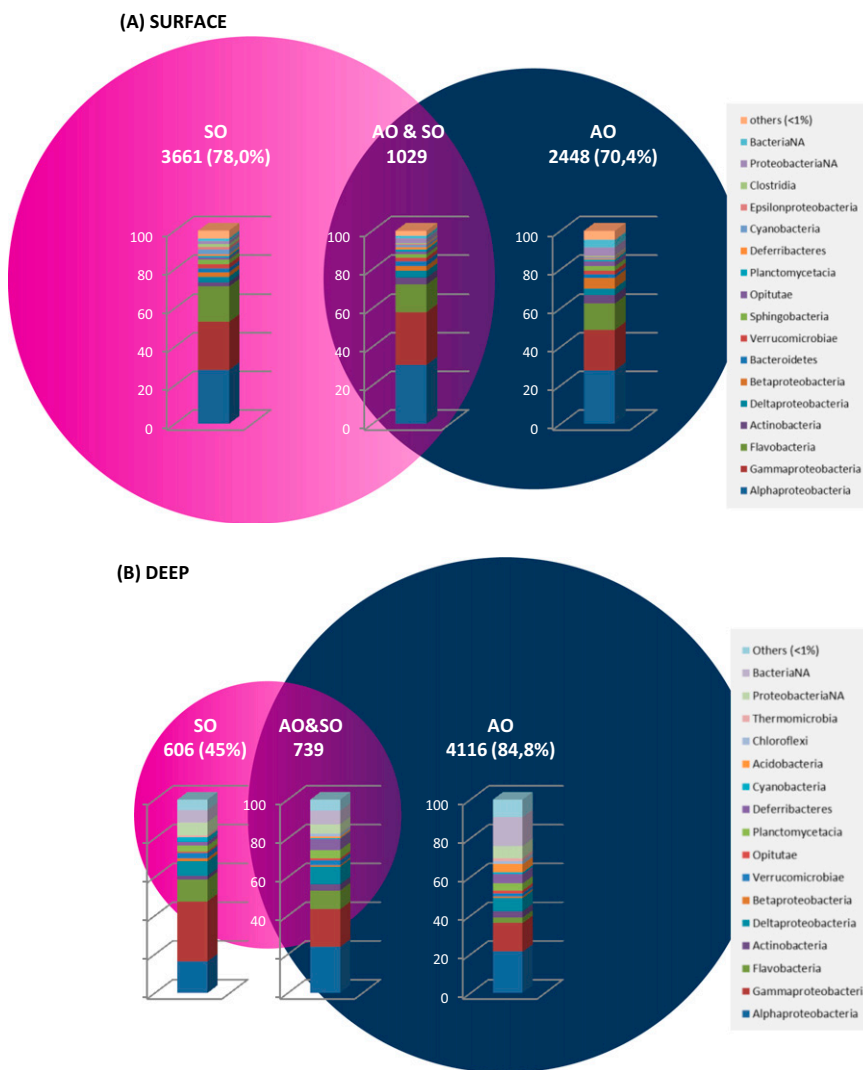

Fig. S2. Venn diagrams representing surface (A) and deep (B) OTUs found in Southern Ocean (SO) and Arctic Ocean (AO) bacterial datasets. Number of OTUs and their relative percentage to the total number of OTU (in brackets) are indicated in bold, and the corresponding number of tag sequences are indicated in brackets. Histograms of corresponding taxonomic composition are grouped at the class level for unique and shared OTUs between polar communities.

Surface ocean OTUs common to each pair of data sets

|           | <b>SO</b> | <b>AO</b> | <b>ML</b> |
|-----------|-----------|-----------|-----------|
| <b>SO</b> | 3264      | 1029      | 817       |
| <b>AO</b> | -         | 2002      | 666       |
| <b>ML</b> | -         |           | 1104      |

Percents of surface ocean OTUs common to each pair of data sets

|           | <b>SO</b> | <b>AO</b> | <b>ML</b> |
|-----------|-----------|-----------|-----------|
| <b>SO</b> | 69.6      | 14.8      | 5.1       |
| <b>AO</b> | -         | 61.1      | 4.5       |
| <b>ML</b> | -         |           | 91.3      |

Deep ocean OTUs common to each pair of data sets

|           | <b>SO</b> | <b>AO</b> | <b>ML</b> |
|-----------|-----------|-----------|-----------|
| <b>SO</b> | 528       | 739       | 627       |
| <b>AO</b> | -         | 2920      | 1744      |
| <b>ML</b> | -         | -         | 7371      |

Percents of deep ocean OTUs common to each pair of data sets

|           | <b>SO</b> | <b>AO</b> | <b>ML</b> |
|-----------|-----------|-----------|-----------|
| <b>SO</b> | 39.2      | 11.9      | 5.9       |
| <b>AO</b> | -         | 60.1      | 12.4      |
| <b>ML</b> | -         | -         | 80.2      |

**Fig. S3.** OTU groupings when all bacterial samples [Southern Ocean (SO), Arctic Ocean (AO), and midlatitude (ML)] were compared in surface and deep ocean datasets. Note that 420 OTUs (2.1%) were common to all three datasets in surface waters, and 548 OTUs (3.6%) were common in deep waters.

**Table S1. Station and sample metadata, categories, and environmental parameters**

| Sample name   | Station ID (CoMM format) with sampling date | Depth (m) | Latitude | Longitude | Ocean region | Ocean subregion     | Total sequences | Total OTUs (0.03) | Salinity (PSU) | Temperature (°C) | Chlorophyll ( $\mu\text{g} \times \text{L}^{-1}$ ) |
|---------------|---------------------------------------------|-----------|----------|-----------|--------------|---------------------|-----------------|-------------------|----------------|------------------|----------------------------------------------------|
| AO_B51_C2     | ACB_0001_2007_07_13                         | 2         | 71.45    | -156.06   | Arctic       | Beaufort Sea        | 15,600          | 786               | 20.0           | 2.5              | 0.33                                               |
| AO_C52_C2     | ACB_0002_2007_07_11                         | 2         | 71.43    | -156.86   | Arctic       | Chukchi Sea         | 9,107           | 462               | 32.0           | 4.6              | 0.50                                               |
| AO_C53_C2     | ACB_0003_2008_01_26                         | 2         | 71.35    | -156.68   | Arctic       | Chukchi Sea         | 17,516          | 387               | 35.0           | -1.8             | 0.07                                               |
| AO_C54_C2     | ACB_0004_2008_01_30                         | 2         | 71.35    | -156.68   | Arctic       | Chukchi Sea         | 19,118          | 666               | 35.0           | -2.0             | 0.06                                               |
| AO_C55_O10    | ACB_0005_2002_07_29                         | 10        | 72.32    | -151.98   | Arctic       | Chukchi Sea         | 19,737          | 517               | 29.4           | -1.5             | 0.57                                               |
| AO_C56_O10    | ACB_0006_2002_08_06                         | 10        | 72.24    | -159.34   | Arctic       | Chukchi Sea         | 14,575          | 472               | 29.5           | -1.1             | 0.22                                               |
| AO_B57_O10    | ACB_0007_2004_07_30                         | 10        | 71.54    | -150.89   | Arctic       | Beaufort Sea        | 17,551          | 465               | 29.9           | 5.2              | 0.64                                               |
| AO_B58_O40    | ACB_0008_2004_08_21                         | 40        | 72.42    | -152.02   | Arctic       | Beaufort Sea        | 14,113          | 427               | 30.3           | -1.2             | 0.27                                               |
| AO_FB13_C3*   | ACB_0013_2004_01_17                         | 3         | 70.04    | -126.30   | Arctic       | Franklin Bay        | 12,389          | 664               | 29.8           | -1.6             | 0.04                                               |
| AO_FB15_C3    | ACB_0015_2004_07_16                         | 3         | 70.05    | -126.31   | Arctic       | Franklin Bay        | 50,884          | 527               | 29.0           | 4.0              | 0.61                                               |
| AO_CS16_C2*   | ACB_0016_2008_01_28                         | 2         | 71.35    | -156.68   | Arctic       | Chukchi Sea         | 19,084          | 799               | 35.0           | -1.8             | 0.06                                               |
| SO_AS1_C10    | ASA_0001_2007_12_18                         | 10        | -73.94   | -115.68   | Antarctic    | Amundsen Sea        | 11,411          | 182               | 33.9           | -2.0             | 8.16                                               |
| SO_AS10_C250  | ASA_0010_2007_12_18                         | 250       | -73.94   | -115.68   | Antarctic    | Amundsen Sea        | 15,636          | 364               | 34.0           | -1.8             | 1.29                                               |
| SO_AS13_C790  | ASA_0013_2007_12_18                         | 790       | -73.96   | -115.86   | Antarctic    | Amundsen Sea        | 23,704          | 802               | 34.5           | 0.4              | NA                                                 |
| SO_AS14_C500  | ASA_0014_2007_12_18                         | 500       | -73.96   | -115.86   | Antarctic    | Amundsen Sea        | 27,983          | 717               | 34.1           | -1.6             | NA                                                 |
| SO_AP1_C6     | CAM_0001_2002_01_17                         | 6         | -64.77   | -64.05    | Antarctic    | Antarctic Peninsula | 20,798          | 442               | 33.6           | 1.6              | NA                                                 |
| SO_AP2_C6*    | CAM_0002_2002_07_17                         | 6         | -64.77   | -64.05    | Antarctic    | Antarctic Peninsula | 10,798          | 826               | 33.8           | -0.7             | 0.04                                               |
| SO_AP3_C6*    | CAM_0003_2002_08_20                         | 6         | -64.77   | -64.05    | Antarctic    | Antarctic Peninsula | 12,662          | 962               | 33.8           | -0.37            | 0.07                                               |
| SO_AP4_C6     | CAM_0004_2006_02_28                         | 6         | -64.77   | -64.07    | Antarctic    | Antarctic Peninsula | 22,147          | 356               | 33.4           | 2.2              | 2.97                                               |
| SO_K15_C3*    | CAM_0005_2007_07_23                         | 3         | -49.37   | -70.20    | Antarctic    | Antarctic Peninsula | 38,796          | 743               | 32.8           | 1.9              | 0.16                                               |
| SO_K16_C3     | CAM_0006_2007_10_09                         | 3         | -49.37   | -70.20    | Antarctic    | Kerguelen Islands   | 32,147          | 563               | 33.3           | 3.2              | 5.04                                               |
| SO_K17_C3     | CAM_0007_2007_02_07                         | 3         | -49.37   | -70.20    | Antarctic    | Kerguelen Islands   | 18,711          | 562               | 33.8           | 6.9              | 0.35                                               |
| SO_K18_C3*    | CAM_0008_2007_05_04                         | 3         | -49.37   | -70.20    | Antarctic    | Kerguelen Islands   | 24,255          | 711               | 33.4           | 4.9              | 0.29                                               |
| SO_WS9_O11    | CAM_0009_2000_03_23                         | 11        | -55.13   | -2.89     | Antarctic    | Weddell Sea         | 20,673          | 545               | NA             | 0.9              | 0.27                                               |
| SO_WS10_O11   | CAM_0010_2000_03_25                         | 11        | -59.32   | -0.40     | Antarctic    | Weddell Sea         | 29,214          | 364               | 34.2           | 0.3              | 0.04                                               |
| SO_WS11_O11   | CAM_0011_2000_03_26                         | 11        | -67.02   | -5.47     | Antarctic    | Weddell Sea         | 19,583          | 412               | NA             | -0.8             | 0.05                                               |
| SO_WS12_C11   | CAM_0012_2000_03_29                         | 11        | -71.18   | -12.46    | Antarctic    | Weddell Sea         | 21,290          | 496               | 34.2           | -1.8             | 0.05                                               |
| SO_RS13_O10   | CAM_0013_2008_02_04                         | 10        | -59.40   | 175.56    | Antarctic    | Ross Sea            | 15,506          | 429               | 33.9           | 4.3              | 0.25                                               |
| SO_RS14_O10   | CAM_0014_2008_02_06                         | 10        | -65.01   | 179.97    | Antarctic    | Ross Sea            | 17,998          | 413               | 33.6           | 1.0              | 0.24                                               |
| SO_RS15_O10   | CAM_0015_2008_02_29                         | 10        | -69.43   | -179.09   | Antarctic    | Ross Sea            | 23,149          | 441               | 33.5           | -1.8             | 0.38                                               |
| SO_RS16_C10   | CAM_0016_2008_02_13                         | 10        | -75.66   | 169.77    | Antarctic    | Ross Sea            | 19,471          | 461               | NA             | -0.8             | 0.69                                               |
| AO_BB1_O1000  | DAO_0001_2007_07_12                         | 1,000     | 68.83    | -61.76    | Arctic       | Baffin Bay          | 27,165          | 720               | 34.5           | 0.9              | 0.00                                               |
| AO_BS3_O1000  | DAO_0003_2007_08_04                         | 1,000     | 71.96    | -150.23   | Arctic       | Beaufort Sea        | 18,873          | 916               | 34.9           | 0.0              | NA                                                 |
| AO_BS4_O400   | DAO_0004_2007_08_04                         | 400       | 71.96    | -150.23   | Arctic       | Beaufort Sea        | 24,725          | 806               | 34.8           | 0.8              | 0.01                                               |
| AO_BS5_O1000  | DAO_0005_2007_08_12                         | 1,000     | 79.99    | -149.99   | Arctic       | Beaufort Sea        | 17,654          | 871               | 34.9           | 0.0              | 0.00                                               |
| AO_B57_O400   | DAO_0007_2007_08_12                         | 400       | 79.99    | -149.99   | Arctic       | Beaufort Sea        | 31,400          | 821               | 34.8           | 0.1              | 0.00                                               |
| AO_BS9_O1000  | DAO_0009_2007_08_15                         | 1,000     | 77.00    | -140.19   | Arctic       | Beaufort Sea        | 14,217          | 1,190             | 34.9           | 0.0              | NA                                                 |
| AO_BS10_O400  | DAO_0010_2007_08_15                         | 400       | 77.00    | -140.19   | Arctic       | Beaufort Sea        | 20,328          | 1,026             | 34.8           | 0.9              | 0.00                                               |
| AO_BS11_O900  | DAO_0011_2007_08_20                         | 900       | 75.84    | -128.64   | Arctic       | Beaufort Sea        | 21,373          | 1,062             | 34.9           | 0.1              | NA                                                 |
| AO_BS12_O1000 | DAO_0012_2007_08_23                         | 1,000     | 73.97    | -140.09   | Arctic       | Beaufort Sea        | 22,612          | 1,109             | 34.9           | 0.0              | 0.00                                               |
| AO_BS13_O400  | DAO_0013_2007_08_23                         | 400       | 73.97    | -140.09   | Arctic       | Beaufort Sea        | 16,487          | 1,000             | 32.8           | 0.7              | 0.00                                               |
| AO_ES14_O1000 | DAO_0014_2007_09_18                         | 1,000     | 77.75    | 126.00    | Arctic       | East Siberian Sea   | 36,728          | 894               | 34.9           | 0.0              | 0.00                                               |
| AO_ES15_O1200 | DAO_0015_2007_09_21                         | 1,200     | 79.94    | 142.39    | Arctic       | East Siberian Sea   | 26,671          | 882               | 34.9           | -0.3             | 0.00                                               |
| AO_ES16_O250  | DAO_0016_2007_09_21                         | 250       | 79.94    | 142.39    | Arctic       | East Siberian Sea   | 15,704          | 967               | 34.8           | 1.4              | 0.00                                               |

**Table S1. Cont.**

| Sample name  | Station ID (iCoMM format) with sampling date | Depth (m) | Latitude | Longitude | Ocean region   | Ocean subregion           | Total sequences | Total OTUs (0.03) | Salinity (PSU) | Temperature (°C) | Chlorophyll (µg × L <sup>-1</sup> ) |
|--------------|----------------------------------------------|-----------|----------|-----------|----------------|---------------------------|-----------------|-------------------|----------------|------------------|-------------------------------------|
| NA112_O4000  | KCK_NADP_Bv6;112R_4121m                      | 4,000     | 50.40    | -25.00    | North Atlantic | North Atlantic Deep Water | 15,497          | 1,356             | 34.9           | 2.3              | NA                                  |
| NA115_O550   | KCK_NADP_Bv6;115R_550m                       | 550       | 50.40    | -25.00    | North Atlantic | North Atlantic Deep Water | 16,334          | 1,021             | 35.1           | 7.0              | NA                                  |
| NA137_O1700  | KCK_NADP_Bv6;137_1710m                       | 1,700     | 60.90    | 38.52     | North Atlantic | North Atlantic Deep Water | 13,759          | 946               | 34.9           | 3.0              | NA                                  |
| NA138_O700   | KCK_NADP_Bv6;138-710m                        | 700       | 60.90    | 38.52     | North Atlantic | North Atlantic Deep Water | 12,980          | 969               | 34.9           | 3.5              | NA                                  |
| NA53_O1400   | KCK_NADP_Bv6;53R_1400m                       | 1,400     | 58.30    | 29.13     | North Atlantic | North Atlantic Deep Water | 12,763          | 1,078             | NA             | NA               | NA                                  |
| NA55_O500    | KCK_NADP_Bv6;55R_500m                        | 500       | 58.30    | 29.13     | North Atlantic | North Atlantic Deep Water | 9,903           | 1,219             | 35.1           | 7.1              | NA                                  |
| M52_C5       | BMO_0002_2007_09_20                          | 5         | 41.65    | 2.80      | Mediterranean  | NW Mediterranean Sea      | 18,361          | 580               | 37.9           | 23.3             | 0.09                                |
| M53_C5       | BMO_0003_2007_09_21                          | 5         | 41.40    | 2.80      | Mediterranean  | NW Mediterranean Sea      | 22,253          | 326               | 37.8           | 23.8             | 0.07                                |
| M54_O5       | BMO_0004_2007_09_21                          | 5         | 41.15    | 2.82      | Mediterranean  | NW Mediterranean Sea      | 17,311          | 360               | 37.9           | 23.8             | 0.08                                |
| M55_O5       | BMO_0005_2007_09_22                          | 5         | 40.91    | 2.85      | Mediterranean  | NW Mediterranean Sea      | 22,951          | 456               | 37.9           | 21.0             | 0.10                                |
| M56_O5       | BMO_0006_2007_09_23                          | 5         | 40.65    | 2.85      | Mediterranean  | NW Mediterranean Sea      | 21,884          | 346               | 37.3           | 24.3             | 0.08                                |
| M59_O500     | BMO_0009_2007_09_22                          | 500       | 40.66    | 2.86      | Mediterranean  | NW Mediterranean Sea      | 23,347          | 711               | 38.516         | 13.185           | NA                                  |
| M510_O2000   | BMO_0010_2007_09_22                          | 2,000     | 40.66    | 2.86      | Mediterranean  | NW Mediterranean Sea      | 14,527          | 987               | 38.479         | 13.213           | NA                                  |
| M511_C500    | BMO_0011_2007_09_22                          | 500       | 40.65    | 2.85      | Mediterranean  | NW Mediterranean Sea      | 12,585          | 764               | 38.516         | 13.185           | NA                                  |
| NA_1_O47     | AOT_0001_2008_11_07                          | 47        | 42.85    | -11.64    | North Atlantic | North Atlantic            | 26,972          | 890               | 35.92          | 16               | NA                                  |
| NA_2_O1100   | AOT_0002_2008_11_09                          | 1,100     | 37.13    | -13.36    | North Atlantic | North Atlantic            | 18,090          | 1,332             | 36.017         | 10.9265          | NA                                  |
| NA_3_O73     | AOT_0003_2008_11_09                          | 73        | 37.13    | -13.36    | North Atlantic | North Atlantic            | 24,795          | 1,140             | 36.0697        | 15.7954          | NA                                  |
| NA_4_O89     | AOT_0004_2008_11_14                          | 89        | 22.51    | -20.50    | North Atlantic | North Atlantic            | 25,787          | 951               | 36.8478        | 22.7556          | NA                                  |
| NA_5_O7      | AOT_0005_2008_11_16                          | 7         | 14.76    | -30.00    | North Atlantic | North Atlantic            | 21,824          | 708               | 35.65          | 26.473           | 0.17                                |
| SA_6_O28*    | AOT_0006_2008_11_29                          | 28        | -23.71   | 8.52      | South Atlantic | South Atlantic            | 18,532          | 702               | 35.5673        | 18.0667          | 0.18                                |
| NA_7_O7      | AOT_0007_2008_11_17                          | 7         | 44.70    | -20.36    | North Atlantic | North Atlantic            | 27,567          | 847               | 35.44          | 15.6             | 0.32                                |
| NA_8_O100    | AOT_0008_2008_11_17                          | 100       | 10.63    | -20.13    | North Atlantic | North Atlantic            | 11,722          | 1,167             | 35.5739        | 15.2887          | NA                                  |
| NA_9_O48     | AOT_0009_2008_11_17                          | 48        | 10.63    | -20.13    | North Atlantic | North Atlantic            | 46,751          | 945               | 35.9724        | 20.4348          | NA                                  |
| NA_10_O11    | AOT_0010_2008_11_17                          | 11        | 10.37    | -20.06    | North Atlantic | North Atlantic            | 20,884          | 723               | 35.09          | 28.214           | 0.39                                |
| NA_12_O1300  | AOT_0012_2008_11_17                          | 1,300     | 10.37    | -20.06    | North Atlantic | North Atlantic            | 16,117          | 1,150             | 34.955         | 4.608            | NA                                  |
| NA_13_O7     | AOT_0013_2008_11_18                          | 7         | 8.50     | -19.50    | North Atlantic | North Atlantic            | 23,799          | 714               | 34.48          | 28.608           | 0.21                                |
| SA_14_O4600* | AOT_0014_2008_11_29                          | 4,600     | -23.71   | 8.52      | South Atlantic | South Atlantic            | 10,151          | 949               | 35.6           | 3.447            | NA                                  |
| SA_16_O48*   | AOT_0016_2008_11_27                          | 48        | -17.74   | 3.13      | South Atlantic | South Atlantic            | 17,126          | 545               | 35.88          | 18.701           | NA                                  |
| AZ_1_O0      | AWP_0001_2007_08_23                          | 0         | 36.05    | -28.35    | Azores         | Azores                    | 17,185          | 727               | 36.73          | 23.6             | 0.08                                |
| AZ_3_O0      | AWP_0003_2007_08_25                          | 0         | 34.21    | -32.12    | Azores         | Azores                    | 22,064          | 746               | 36.932         | 25.3             | 0.07                                |
| AZ_6_O0      | AWP_0006_2007_08_25                          | 0         | 34.21    | -32.12    | Azores         | Azores                    | 20,528          | 623               | 36.932         | 25.3             | 0.07                                |
| AZ_7_O0      | AWP_0007_2007_08_25                          | 0         | 35.48    | -32.43    | Azores         | Azores                    | 17,419          | 614               | 36.863         | 24.6             | 0.08                                |
| AZ_8_O0      | AWP_0008_2007_08_26                          | 0         | 37.48    | -30.57    | Azores         | Azores                    | 25,041          | 596               | 36.172         | 23.1             | 0.09                                |
| AZ_9_O3660   | AWP_0009_2007_06_11                          | 3,660     | 37.34    | -18.88    | Azores         | Azores                    | 25,840          | 1,044             | 34.92          | 2.56             | NA                                  |
| AZ_10_O2100  | AWP_0010_2007_06_11                          | 2,100     | 37.34    | -18.88    | Azores         | Azores                    | 24,343          | 972               | 35             | 3.69             | NA                                  |
| AZ_11_O1200  | AWP_0011_2007_06_11                          | 1,200     | 37.34    | -18.88    | Azores         | Azores                    | 20,825          | 1,238             | 35.84          | 9.11             | NA                                  |
| AZ_12_O800   | AWP_0012_2007_06_11                          | 800       | 37.34    | -18.88    | Azores         | Azores                    | 23,238          | 1,301             | 35.67          | 10.33            | NA                                  |
| AZ_13_O100   | AWP_0013_2007_06_11                          | 100       | 37.34    | -18.88    | Azores         | Azores                    | 24,435          | 842               | 36.19          | 16.37            | NA                                  |
| AZ_14_O0     | AWP_0014_2007_06_11                          | 0         | 37.34    | -18.88    | Azores         | Azores                    | 25,370          | 585               | 36.4           | 18.54            | 0.12                                |
| AZ_15_O800   | AWP_0015_2007_06_02                          | 800       | 31.86    | -27.88    | Azores         | Azores                    | 21,776          | 1,131             | 36.19          | 10               | NA                                  |
| AZ_16_O100   | AWP_0016_2007_06_02                          | 100       | 31.86    | -27.88    | Azores         | Azores                    | 27,904          | 1,398             | 37             | 18.54            | NA                                  |
| SP_2_O110    | KNX_0002_2006_12_24                          | 110       | -26.05   | -156.89   | South Pacific  | South Pacific             | 26,953          | 1,154             | 35.57          | 18.13            | 0.39                                |
| SP3_O120     | KNX_0003_2006_12_27                          | 120       | -27.94   | -148.59   | South Pacific  | South Pacific             | 23,273          | 1,118             | 35.5           | 18.5             | 0.36                                |
| SP_4_O150    | KNX_0004_2006_12_30                          | 150       | -26.48   | -137.94   | South Pacific  | South Pacific             | 18,093          | 1,198             | 35.5           | 19.37            | 0.22                                |

**Table S1. Cont.**

| Sample name | Station ID (CoMM format with sampling date) | Depth (m) | Latitude | Longitude | Ocean region  | Ocean subregion | Total sequences | Total OTUs (0.03) | Salinity (PSU) | Temperature (°C) | Chlorophyll ( $\mu\text{g} \times \text{L}^{-1}$ ) |
|-------------|---------------------------------------------|-----------|----------|-----------|---------------|-----------------|-----------------|-------------------|----------------|------------------|----------------------------------------------------|
| SP_5_O145   | KNX_0005_2007_01_01                         | 145       | -28.45   | -131.39   | South Pacific | South Pacific   | 24,661          | 1,217             | 35.39          | 18.1             | 0.35                                               |
| SP_6_O200   | KNX_0006_2007_01_07                         | 200       | -27.74   | -117.62   | South Pacific | South Pacific   | 30,918          | 1,277             | 35.5           | 18.76            | 0.27                                               |
| SP_7_O110   | KNX_0007_2007_01_11                         | 110       | -38.06   | -133.09   | South Pacific | South Pacific   | 21,932          | 891               | 34.3           | 11.5             | 0.30                                               |
| SP_8_O100   | KNX_0008_2007_01_13                         | 100       | -39.31   | -139.80   | South Pacific | South Pacific   | 16,099          | 792               | 34.36          | 11.2             | 0.40                                               |

Terms for sample name were designated by abbreviations derived from the ocean region, subregion, and depth. Environmental parameters derived from remotely sensed data are indicated in boldface italics (select temperature and chlorophyll values). NA, not available.

Asterisks (\*) indicate samples collected in the winter.
